# Supplementary material for: A molecular tailoring approach – a new guide to quantify the energy of push–pull effects: a case study on (E)-3-(1H-pyrrol-2-yl)prop-2-enones
Source: Royal Society of Chemistry journal article supplement (doi:10.1039/d0cp04432f), 2020-01-01
Supplement: d0cp04432f1.pdf [file d0cp04432f1.pdf]

## Electronics Supplementary Information (ESI)

### Molecular Tailoring Approach – New Guide to Quantify the Energy of Push-Pull Effect: Case Study on the (*E*) 3-(1H-pyrrol-2-yl)prop-2-enones

Andrei V. Afonin\*<sup>†a</sup> and Danuta Rusinska-Roszak\*<sup>†b</sup>

<sup>a</sup> A. E. Favorsky Irkutsk Institute of Chemistry, Siberian Division of Russian Academy of Sciences, 1 Favorsky St., 664033 Irkutsk, Russian Federation. E-mail: andvalaf@irioch.irk.ru

<sup>b</sup> Institute of Chemical Technology and Engineering, Poznan University of Technology, ul. Berdychowo 4, 60-965 Poznan, Poland. E-mail: danuta.rusinska-roszak@put.poznan.pl

<sup>†</sup> Equal contribution.

\* E-mail: [andvalaf@irioch.irk.ru](mailto:andvalaf@irioch.irk.ru) (Andrei V. Afonin); [danuta.rusinska-roszak@put.poznan.pl](mailto:danuta.rusinska-roszak@put.poznan.pl) (Danuta Rusinska-Roszak)

| Contents                                                                                                                                                                                                                                                                                                                                                               | Page |
|------------------------------------------------------------------------------------------------------------------------------------------------------------------------------------------------------------------------------------------------------------------------------------------------------------------------------------------------------------------------|------|
| <b>1. Table S1.</b> The $R_1$ , $R_2$ substituents and their Hammett constants for the studied ( <i>E</i> ) 3-(1H-pyrrol-2-yl)prop-2-enones <b>1–35</b>                                                                                                                                                                                                                | S2   |
| <b>2. Table S2.</b> The calculated $E_\pi$ (MTA) energy, bond length, C=O vibration frequency and $^{13}\text{C}$ chemical shifts for the enones <b>1–35</b>                                                                                                                                                                                                           | S3   |
| <b>3. Table S3.</b> The calculated $E_\pi$ (MTA) energy, bond length, C=O vibration frequency and $^{13}\text{C}$ chemical shifts ( $\delta$ , ppm) for the enones <b>4–6, 8, 13, 18, 21 – 23, 27, 30, 35</b> in different conformations                                                                                                                               | S4   |
| <b>4. Table S4.</b> The Mulliken charge in the enones <b>1, 2, 17, 19, 34</b>                                                                                                                                                                                                                                                                                          | S5   |
| <b>5. Figure S1.</b> Dependence of the $E_\pi$ (MTA) values on the $l(\text{C}_2\text{--C}_6)$ bond length for the compounds <b>1, 19–35</b>                                                                                                                                                                                                                           | S6   |
| <b>6. Figure S2.</b> Dependence of the $E_\pi$ (MTA) values on the $l(\text{C}_6\text{=C}_7)$ bond length for the compounds <b>1, 19–35</b>                                                                                                                                                                                                                            | S6   |
| <b>7. Figure S3.</b> Dependence of the $E_\pi$ (MTA) values on the $l(\text{C}_7\text{--C}_8)$ bond length for the compounds <b>1, 19–35</b>                                                                                                                                                                                                                           | S7   |
| <b>8. Figure S4.</b> Plot of the $E_\pi$ (MTA) values vs the $l(\text{C}_8\text{=O}_9)$ bond length for the compounds <b>1, 19–35</b>                                                                                                                                                                                                                                  | S7   |
| <b>9. Figure S5.</b> Plot of the $E_\pi$ (MTA) values vs the $\nu_{\text{C=O}}$ vibrational frequency for the compounds <b>1, 19–35</b>                                                                                                                                                                                                                                | S8   |
| <b>10. Figure S6.</b> Plot of the $E_\pi$ (MTA) values vs the $\Delta\delta_{\text{C=C}}$ $^{13}\text{C}$ chemical shift difference for the compounds <b>1, 19 – 35</b>                                                                                                                                                                                                | S8   |
| <b>11. Equations (S1) – (S9).</b> Dependence of the $E_\pi$ (MTA) values on the $l(\text{C}_2\text{--C}_6)$ , $l(\text{C}_6\text{=C}_7)$ , $l(\text{C}_7\text{--C}_8)$ and $l(\text{C}_8\text{=O}_9)$ bond lengths, the $\nu_{\text{C=O}}$ vibrational frequency and the $\Delta\delta_{\text{C=C}}$ $^{13}\text{C}$ chemical difference for the compounds <b>1–35</b> | S9   |
| <b>12.</b> Details of calculation, atom coordinates and total energies for B3LYP/6-311++G(d,p) optimized geometries of studied compounds <b>1–35</b>                                                                                                                                                                                                                   | S10  |

**1. Table S1.** The  $R_1$  and  $R_2$  substituents and their Hammett constants for the studied (*E*) 3-(1H-pyrrol-2-yl)prop-2-enones **1–35**

| N Comp    | $R_1$ ( $R_2=H$ )                             | N Comp    | $R_2$ ( $R_1=H$ )                             | $\sigma_p^a$ |
|-----------|-----------------------------------------------|-----------|-----------------------------------------------|--------------|
| <b>1</b>  | H                                             |           |                                               | 0.00         |
| <b>2</b>  | N(CH <sub>3</sub> ) <sub>2</sub>              | <b>19</b> | N(CH <sub>3</sub> ) <sub>2</sub>              | -0.83        |
| <b>3</b>  | NH <sub>2</sub>                               | <b>20</b> | NH <sub>2</sub>                               | -0.66        |
| <b>4</b>  | NHNH <sub>2</sub>                             | <b>21</b> | NHNH <sub>2</sub>                             | -0.55        |
| <b>5</b>  | OH                                            | <b>22</b> | OH                                            | -0.37        |
| <b>6</b>  | OCH <sub>3</sub>                              | <b>23</b> | OCH <sub>3</sub>                              | -0.27        |
| <b>7</b>  | CH <sub>3</sub>                               | <b>24</b> | CH <sub>3</sub>                               | -0.17        |
| <b>8</b>  | CH <sub>2</sub> C <sub>6</sub> H <sub>5</sub> | <b>25</b> | CH <sub>2</sub> C <sub>6</sub> H <sub>5</sub> | -0.09        |
| <b>9</b>  | F                                             | <b>26</b> | F                                             | 0.06         |
| <b>10</b> | SH                                            | <b>27</b> | SH                                            | 0.15         |
| <b>11</b> | Cl                                            | <b>28</b> | Cl                                            | 0.23         |
| <b>12</b> | CONH <sub>2</sub>                             | <b>29</b> | CONH <sub>2</sub>                             | 0.36         |
| <b>13</b> | CHO                                           | <b>30</b> | CHO                                           | 0.42         |
| <b>14</b> | CCl <sub>3</sub>                              | <b>31</b> | CCl <sub>3</sub>                              | 0.46         |
| <b>15</b> | CF <sub>3</sub>                               | <b>32</b> | CF <sub>3</sub>                               | 0.54         |
| <b>16</b> | CN                                            | <b>33</b> | CN                                            | 0.66         |
| <b>17</b> | NO <sub>2</sub>                               | <b>34</b> | NO <sub>2</sub>                               | 0.78         |
| <b>18</b> | NO                                            | <b>35</b> | NO                                            | 0.91         |

<sup>a</sup>Taken from ref. 10

**2. Table S2.** The calculated  $E_{\pi}$ (MTA) energy (kcal mol<sup>-1</sup>), bond length ( $l$ , Å), vibration frequency ( $\nu$ , cm<sup>-1</sup>) and chemical shifts ( $\delta$ , ppm) for the enones **1–35**

| N<br>Comp             | Energy           | Bond lengths               |                            |                            |                            | Frequency          | Chemical shifts    |                    |                               |
|-----------------------|------------------|----------------------------|----------------------------|----------------------------|----------------------------|--------------------|--------------------|--------------------|-------------------------------|
|                       | $-E_{\pi}$ (MTA) | $l(\text{C}_2\text{-C}_6)$ | $l(\text{C}_6\text{=C}_7)$ | $l(\text{C}_7\text{-C}_8)$ | $l(\text{C}_8\text{=O}_9)$ | $\nu_{\text{C=O}}$ | $\delta\text{C}_6$ | $\delta\text{C}_7$ | $\Delta\delta_{\text{C=C}}^e$ |
| <b>1</b>              | 3.66             | 1.4281                     | 1.3551                     | 1.4646                     | 1.2177                     | 1749               | 136.90             | 118.90             | 18.00                         |
| <b>2</b>              | 5.88             | 1.4153                     | 1.3631                     | 1.4559                     | 1.2216                     | 1733               | 134.34             | 113.87             | 20.47                         |
| <b>3</b>              | 5.15             | 1.4184                     | 1.3605                     | 1.4583                     | 1.2207                     | 1737               | 135.28             | 115.09             | 20.19                         |
| <b>4<sup>a</sup></b>  | 5.31             | 1.4191                     | 1.3615                     | 1.4575                     | 1.2208                     | 1737               | 135.22             | 114.83             | 20.39                         |
| <b>5<sup>b</sup></b>  | 4.68             | 1.4208                     | 1.3584                     | 1.4606                     | 1.2197                     | 1742               | 135.91             | 116.41             | 19.50                         |
| <b>6<sup>a</sup></b>  | 4.92             | 1.4206                     | 1.3598                     | 1.4593                     | 1.2201                     | 1740               | 135.85             | 115.88             | 19.97                         |
| <b>7</b>              | 4.24             | 1.4251                     | 1.3569                     | 1.4624                     | 1.2188                     | 1745               | 136.49             | 117.67             | 18.82                         |
| <b>8<sup>a</sup></b>  | 4.21             | 1.4255                     | 1.3568                     | 1.4624                     | 1.2188                     | 1745               | 136.43             | 118.12             | 18.31                         |
| <b>9</b>              | 3.67             | 1.4250                     | 1.3553                     | 1.4645                     | 1.2178                     | 1748               | 136.61             | 118.16             | 18.45                         |
| <b>10<sup>c</sup></b> | 3.26             | 1.4303                     | 1.3537                     | 1.4666                     | 1.2171                     | 1751               | 136.62             | 120.34             | 16.28                         |
| <b>11</b>             | 3.43             | 1.4274                     | 1.3546                     | 1.4655                     | 1.2174                     | 1750               | 136.06             | 119.13             | 16.93                         |
| <b>12<sup>d</sup></b> | 2.87             | 1.4313                     | 1.3530                     | 1.4683                     | 1.2162                     | 1754               | 137.30             | 121.26             | 16.04                         |
| <b>13<sup>a</sup></b> | 2.28             | 1.4342                     | 1.3513                     | 1.4712                     | 1.2152                     | 1754               | 136.74             | 123.91             | 12.83                         |
| <b>14</b>             | 2.60             | 1.4329                     | 1.3516                     | 1.4699                     | 1.2158                     | 1756               | 136.83             | 122.13             | 14.70                         |
| <b>15</b>             | 2.44             | 1.4337                     | 1.3511                     | 1.4704                     | 1.2155                     | 1757               | 136.84             | 122.19             | 14.65                         |
| <b>16</b>             | 2.33             | 1.4341                     | 1.3509                     | 1.4715                     | 1.2151                     | 1758               | 135.73             | 123.12             | 12.61                         |
| <b>17</b>             | 1.94             | 1.4357                     | 1.3495                     | 1.4742                     | 1.2141                     | 1760               | 136.15             | 125.42             | 10.73                         |
| <b>18<sup>a</sup></b> | 1.74             | 1.4355                     | 1.3501                     | 1.4742                     | 1.2141                     | 1760               | 138.03             | 126.58             | 11.45                         |
| <b>19</b>             | 2.54             | 1.4351                     | 1.3488                     | 1.4855                     | 1.2300                     | 1704               | 140.53             | 109.92             | 30.61                         |
| <b>20</b>             | 2.19             | 1.4343                     | 1.3475                     | 1.4821                     | 1.2232                     | 1741               | 139.55             | 112.30             | 27.25                         |
| <b>21<sup>a</sup></b> | 2.7              | 1.4345                     | 1.3482                     | 1.4766                     | 1.2254                     | 1730               | 139.10             | 110.68             | 28.42                         |
| <b>22<sup>a</sup></b> | 3.13             | 1.4309                     | 1.3503                     | 1.4709                     | 1.2085                     | 1790               | 143.55             | 108.91             | 34.64                         |
| <b>23<sup>a</sup></b> | 3.12             | 1.4319                     | 1.3505                     | 1.4723                     | 1.2108                     | 1764               | 143.08             | 107.77             | 35.31                         |
| <b>24</b>             | 3.23             | 1.4311                     | 1.3518                     | 1.4781                     | 1.2211                     | 1742               | 137.59             | 117.95             | 19.64                         |
| <b>25<sup>b</sup></b> | 4.07             | 1.4307                     | 1.3522                     | 1.4738                     | 1.2213                     | 1734               | 138.16             | 118.13             | 20.03                         |
| <b>26</b>             | 4.13             | 1.4270                     | 1.3540                     | 1.4535                     | 1.1907                     | 1850               | 146.34             | 105.42             | 40.92                         |
| <b>27<sup>a</sup></b> | 3.98             | 1.4290                     | 1.3531                     | 1.4677                     | 1.2092                     | 1744               | 136.77             | 118.24             | 18.53                         |
| <b>28</b>             | 5.15             | 1.4255                     | 1.3564                     | 1.4540                     | 1.1900                     | 1831               | 141.64             | 116.98             | 24.66                         |
| <b>29<sup>d</sup></b> | 5.59             | 1.4255                     | 1.3568                     | 1.4528                     | 1.2254                     | 1760               | 141.72             | 113.21             | 28.51                         |
| <b>30<sup>a</sup></b> | 5.15             | 1.4287                     | 1.3577                     | 1.4584                     | 1.2209                     | 1728               | 142.87             | 113.96             | 28.91                         |
| <b>31</b>             | 5.5              | 1.4259                     | 1.3555                     | 1.4601                     | 1.2090                     | 1760               | 143.81             | 112.93             | 30.88                         |
| <b>32</b>             | 5.39             | 1.4236                     | 1.3574                     | 1.4562                     | 1.2131                     | 1762               | 142.79             | 112.46             | 30.33                         |
| <b>33</b>             | 5.8              | 1.4218                     | 1.3591                     | 1.4560                     | 1.2187                     | 1717               | 140.68             | 119.90             | 20.78                         |
| <b>34</b>             | 6.92             | 1.4202                     | 1.3614                     | 1.4383                     | 1.1901                     | 1858               | 149.32             | 101.25             | 48.07                         |
| <b>35<sup>a</sup></b> | 5.61             | 1.4228                     | 1.3588                     | 1.4485                     | 1.2055                     | 1784               | 155.72             | 108.13             | 47.59                         |

<sup>a</sup>The parameters are averaged between the *s-cis* and *s-trans* conformations (see Table S3); <sup>b</sup>only the *s-cis* conformation with respect to the exocyclic C=C bond; <sup>c</sup>only *gauche* conformation; <sup>d</sup>only the *s-trans* conformation with respect to the exocyclic C=C bond; <sup>e</sup>only the *s-trans* conformation of the carbonyl groups; <sup>e</sup> $\Delta\delta_{\text{C=C}} = \delta\text{C}_6 - \delta\text{C}_7$

**3. Table S3.** The calculated  $E_{\pi}$ (MTA) energy (kcal mol<sup>-1</sup>), bond length ( $l$ , Å), C=O vibration frequency ( $\nu$ , cm<sup>-1</sup>) and <sup>13</sup>C chemical shifts ( $\delta$ , ppm) for the enones **4–6**, **8**, **13**, **18**, **21–23**, **27**, **30**, **35** in different conformations<sup>a</sup>

| N Comp<br>& substit.<br>conform. | Energy           |                            | Bond lengths               |                            |                            | Freq                      | Chemical shifts    |                    |                                      |
|----------------------------------|------------------|----------------------------|----------------------------|----------------------------|----------------------------|---------------------------|--------------------|--------------------|--------------------------------------|
|                                  | $-E_{\pi}$ (MTA) | $l(\text{C}_2-\text{C}_6)$ | $l(\text{C}_6=\text{C}_7)$ | $l(\text{C}_7-\text{C}_8)$ | $l(\text{C}_8=\text{O}_9)$ | $\nu_{\text{C}=\text{O}}$ | $\delta\text{C}_6$ | $\delta\text{C}_7$ | $\Delta\delta_{\text{C}=\text{C}}^b$ |
| <b>4</b> <i>cis</i>              | 5.51             | 1.4167                     | 1.3618                     | 1.4570                     | 1.2211                     | 1736                      | 135.37             | 114.42             | 20.95                                |
| <b>4</b> <i>trans</i>            | 5.10             | 1.4175                     | 1.3611                     | 1.4581                     | 1.2205                     | 1737                      | 135.08             | 115.25             | 19.83                                |
| <b>6</b> <i>cis</i>              | 4.80             | 1.4206                     | 1.3588                     | 1.4600                     | 1.2199                     | 1740                      | 135.98             | 116.52             | 19.46                                |
| <b>6</b> <i>trans</i>            | 5.13             | 1.4177                     | 1.3607                     | 1.4586                     | 1.2202                     | 1739                      | 135.73             | 115.25             | 20.48                                |
| <b>8</b> <i>cis</i>              | 4.15             | 1.4251                     | 1.3570                     | 1.4623                     | 1.2188                     | 1745                      | 136.61             | 117.57             | 19.04                                |
| <b>8</b> <i>trans</i>            | 4.26             | 1.4258                     | 1.3565                     | 1.4625                     | 1.2189                     | 1745                      | 136.24             | 118.67             | 17.57                                |
| <b>13</b> <i>cis</i>             | 2.38             | 1.4334                     | 1.3517                     | 1.4706                     | 1.2153                     | 1750                      | 136.71             | 123.04             | 13.67                                |
| <b>13</b> <i>trans</i>           | 2.18             | 1.4350                     | 1.3508                     | 1.4717                     | 1.2152                     | 1757                      | 136.76             | 124.78             | 11.98                                |
| <b>18</b> <i>cis</i>             | 1.84             | 1.4350                     | 1.3503                     | 1.4737                     | 1.2143                     | 1759                      | 136.86             | 126.03             | 10.83                                |
| <b>18</b> <i>trans</i>           | 1.64             | 1.4360                     | 1.3499                     | 1.4748                     | 1.2139                     | 1760                      | 139.19             | 127.13             | 12.06                                |
| <b>21</b> <i>cis</i>             | 2.38             | 1.4342                     | 1.3479                     | 1.4779                     | 1.2251                     | 1729                      | 138.83             | 111.40             | 27.43                                |
| <b>21</b> <i>trans</i>           | 3.01             | 1.4348                     | 1.3485                     | 1.4753                     | 1.2257                     | 1730                      | 139.37             | 109.96             | 29.41                                |
| <b>22</b> <i>cis</i>             | 3.26             | 1.4312                     | 1.3502                     | 1.4647                     | 1.2124                     | 1774                      | 143.07             | 109.45             | 33.62                                |
| <b>22</b> <i>trans</i>           | 3.00             | 1.4305                     | 1.3504                     | 1.4771                     | 1.2047                     | 1805                      | 144.03             | 108.38             | 35.65                                |
| <b>23</b> <i>cis</i>             | 3.21             | 1.4310                     | 1.3517                     | 1.4769                     | 1.2084                     | 1771                      | 145.14             | 103.13             | 42.01                                |
| <b>23</b> <i>trans</i>           | 3.02             | 1.4327                     | 1.3493                     | 1.4678                     | 1.2131                     | 1757                      | 141.03             | 112.41             | 28.62                                |
| <b>27</b> <i>cis</i>             | 3.89             | 1.4289                     | 1.3533                     | 1.4698                     | 1.2091                     | 1741                      | 137.34             | 119.06             | 18.28                                |
| <b>27</b> <i>trans</i>           | 4.06             | 1.4291                     | 1.3530                     | 1.4657                     | 1.2092                     | 1746                      | 136.20             | 117.41             | 18.79                                |
| <b>30</b> <i>cis</i>             | 5.34             | 1.4247                     | 1.3571                     | 1.4544                     | 1.2243                     | 1720                      | 141.63             | 110.49             | 31.14                                |
| <b>30</b> <i>trans</i>           | 4.96             | 1.4327                     | 1.3582                     | 1.4623                     | 1.2176                     | 1735                      | 144.11             | 117.43             | 26.68                                |
| <b>35</b> <i>cis</i>             | 5.84             | 1.4219                     | 1.3598                     | 1.4469                     | 1.2034                     | 1794                      | 160.43             | 126.29             | 34.14                                |
| <b>35</b> <i>trans</i>           | 5.37             | 1.4238                     | 1.3578                     | 1.4502                     | 1.2077                     | 1774                      | 151.00             | 89.96              | 61.04                                |

<sup>a</sup>The *cis* and *trans* conformations are defined with respect to the exocyclic C=C bond; <sup>b</sup> $\Delta\delta_{\text{C}=\text{C}} = \delta\text{C}_6 - \delta\text{C}_7$ .

**4. Table S4.** The Mulliken charges in the enones **1**, **2**, **17**, **19**, **34**

| N Comp                                             | Frag<br>ment | charge, <i>e</i>           |                            |                            |                            |                            |                            |                            |                            |                            |
|----------------------------------------------------|--------------|----------------------------|----------------------------|----------------------------|----------------------------|----------------------------|----------------------------|----------------------------|----------------------------|----------------------------|
|                                                    |              | <i>q</i> (N <sub>1</sub> ) | <i>q</i> (C <sub>2</sub> ) | <i>q</i> (C <sub>3</sub> ) | <i>q</i> (C <sub>4</sub> ) | <i>q</i> (C <sub>5</sub> ) | <i>q</i> (C <sub>6</sub> ) | <i>q</i> (C <sub>7</sub> ) | <i>q</i> (C <sub>8</sub> ) | <i>q</i> (O <sub>9</sub> ) |
| <b>1</b>                                           | M            | -0.1943                    | 0.0218                     | 0.1197                     | -0.3609                    | 0.0392                     | 0.0303                     | 0.0933                     | 0.1264                     | -0.5318                    |
| <b>R<sub>1</sub>=H</b>                             | M1           | -                          | -                          | -                          | -                          | -                          | -0.1074                    | 0.0432                     | 0.2652                     | -0.5068                    |
| <b>R<sub>2</sub>=H</b>                             | M2           | -0.1888                    | 0.2786                     | 0.0919                     | -0.3233                    | 0.0497                     | -0.0853                    | -0.3990                    | -                          | -                          |
| <b>2</b>                                           | M            | -0.3314                    | 0.0925                     | -0.0972                    | -0.0625                    | 0.2649                     | 0.0495                     | 0.0024                     | 0.0881                     | -0.5501                    |
| <b>R<sub>1</sub>=N(CH<sub>3</sub>)<sub>2</sub></b> | M1           | -                          | -                          | -                          | -                          | -                          | -0.1031                    | 0.0423                     | 0.2639                     | -0.5104                    |
| <b>R<sub>2</sub>=H</b>                             | M2           | -0.3293                    | 0.5015                     | -0.1153                    | -0.0426                    | 0.3152                     | -0.3026                    | -0.4428                    | -                          | -                          |
| <b>17</b>                                          | M            | -0.2229                    | 0.1176                     | -0.0403                    | 0.0460                     | 0.1575                     | -0.0282                    | 0.1103                     | 0.1248                     | -0.4947                    |
| <b>R<sub>1</sub>=NO<sub>2</sub></b>                |              |                            |                            |                            |                            |                            |                            | (0.1079) <sup>a</sup>      | (0.0367)                   | (0.0554)                   |
| <b>R<sub>2</sub>=H</b>                             | M1           | -                          | -                          | -                          | -                          | -                          | -0.1108                    | 0.0417                     | 0.2672                     | -0.5032                    |
|                                                    |              |                            |                            |                            |                            |                            |                            | (0.0015)                   | (0.0033)                   | (0.0072)                   |
|                                                    | M2           | -0.2508                    | 0.5262                     | -0.1984                    | 0.3008                     | -0.0153                    | -0.2064                    | -0.3542                    | -                          | -                          |
| <b>19</b>                                          | M            | -0.2040                    | -0.199                     | 0.1375                     | -0.3985                    | 0.0304                     | 0.0341                     | 0.0070                     | 0.6848                     | -0.6639                    |
| <b>R<sub>1</sub>=H</b>                             |              |                            | 3                          |                            |                            |                            |                            |                            |                            |                            |
| <b>R<sub>2</sub>=N(CH<sub>3</sub>)<sub>2</sub></b> | M1           | -                          | -                          | -                          | -                          | -                          | -0.3916                    | 0.3007                     | 0.4674                     | -0.6632                    |
|                                                    | M2           | -0.1902                    | 0.2789                     | 0.0918                     | -0.3238                    | 0.0501                     | -0.0928                    | -0.3874                    | -                          | -                          |
| <b>34</b>                                          | M            | -0.1894                    | -0.132                     | 0.1436                     | -0.3785                    | 0.0575                     | -0.0498                    | -0.1247                    | 0.7418                     | -0.4786                    |
| <b>R<sub>1</sub>=H</b>                             |              |                            | 7                          | (0.0239) <sup>b</sup>      | (0.0200)                   | (0.0274)                   |                            |                            |                            |                            |
| <b>R<sub>2</sub>=NO<sub>2</sub></b>                | M1           | -                          | -                          | -                          | -                          | -                          | -0.2680                    | 0.2047                     | 0.4185                     | -0.4452                    |
|                                                    | M2           | -0.1856                    | 0.2763                     | 0.0930                     | -0.3234                    | 0.0487                     | -0.0885                    | -0.3987                    | -                          | -                          |
|                                                    |              |                            |                            | (0.0012)                   | (0.0004)                   | (0.0014)                   |                            |                            |                            |                            |

<sup>a</sup>difference between charges in the enones **17** and **2** (**34** and **19**) or their M1 (M2) fragments is given in the parentheses.

<sup>b</sup>difference between charges in the enones **34** and **1** in this case.

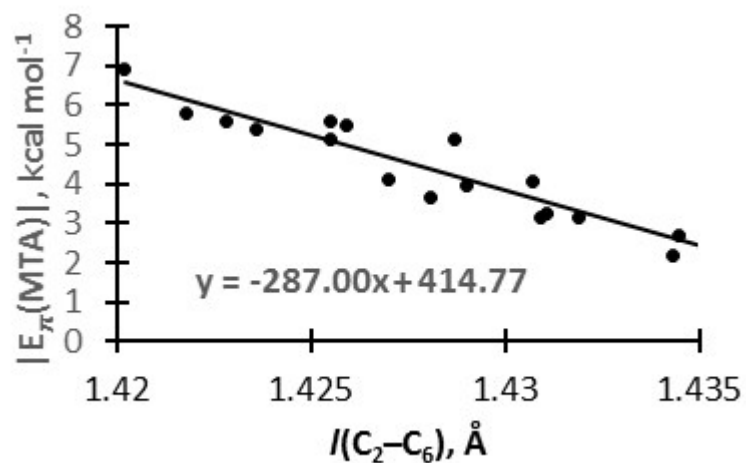

5. **Figure S1.** Dependence of the  $E_{\pi}(\text{MTA})$  values on the  $l(\text{C}_2-\text{C}_6)$  bond length for the compounds **1**, **19–35**

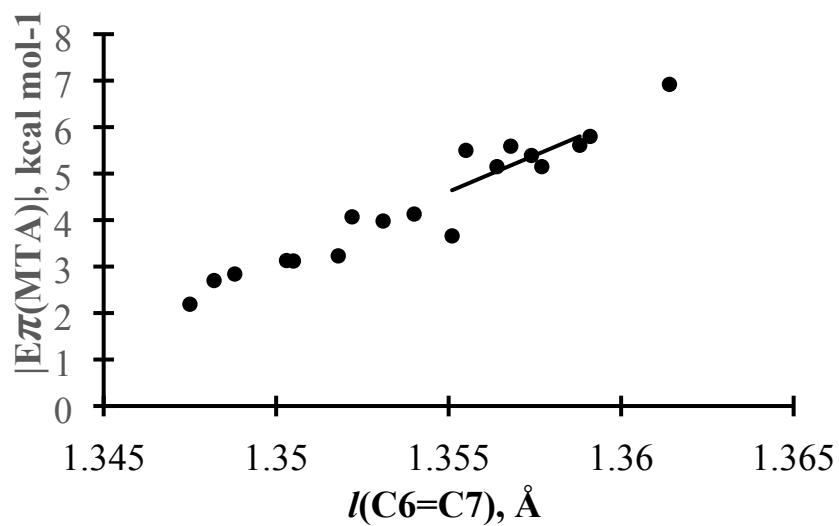

6. **Figure S2.** Dependence of the  $E_{\pi}(\text{MTA})$  values on the  $l(\text{C}_6=\text{C}_7)$  bond length for the compounds **1**, **19–35**

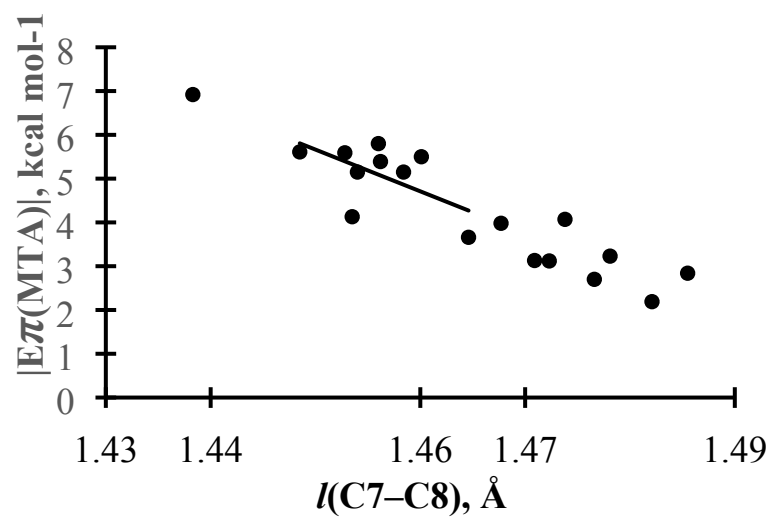

7. **Figure S3.** Dependence of the  $E_{\pi}(\text{MTA})$  values on the  $l(\text{C}_7\text{-C}_8)$  bond length for the compounds **1**, **19-35**

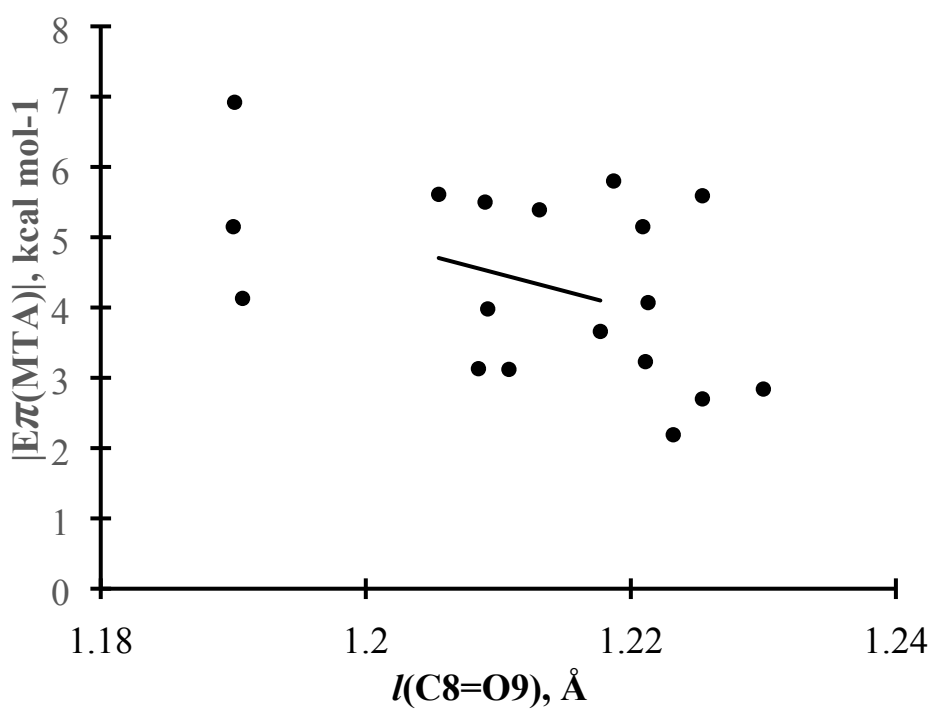

8. **Figure S4.** Plot of the  $E_{\pi}(\text{MTA})$  values vs the  $l(\text{C}_8=\text{O}_9)$  bond length for the compounds **1**, **19-35**

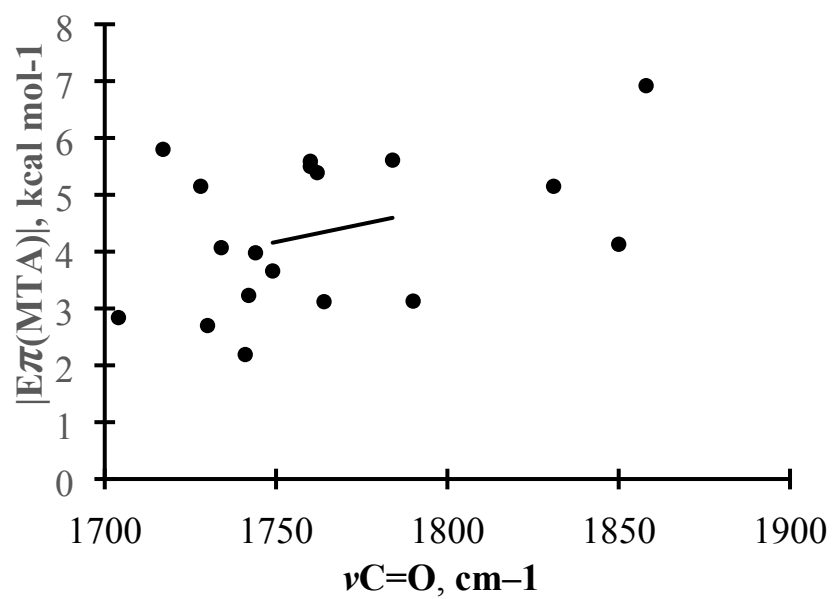

9. Figure S5. Plot of the  $E_{\pi}(\text{MTA})$  values vs the  $\nu_{\text{C=O}}$  vibrational frequency for the compounds **1**, **19–35**

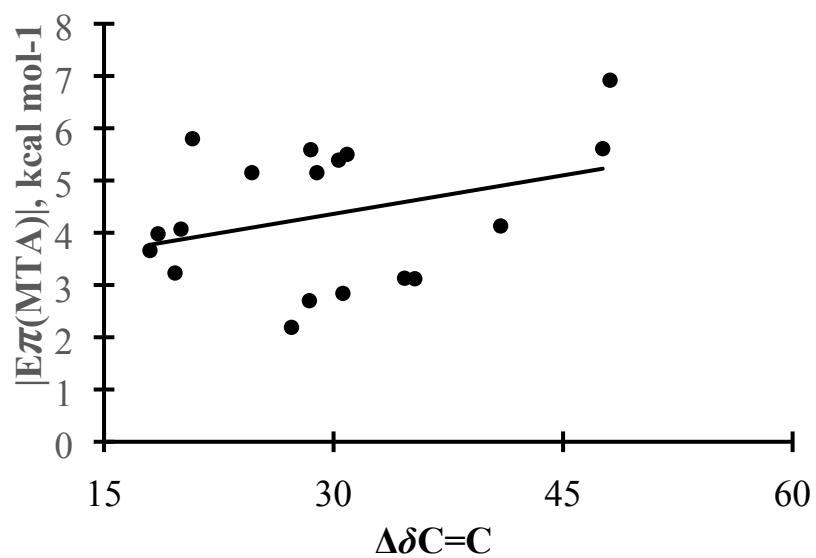

10. Figure S6. Plot of the  $E_{\pi}(\text{MTA})$  values vs the  $\Delta\delta_{\text{C=C}}^{13\text{C}}$  chemical shift difference for the compounds **1**, **19–35**



## 11. Equations (S1) – (S9)

For enones **1–18**:  $|E_{\pi}(\text{MTA})| = -190.95 \times l(\text{C}_2\text{--C}_6) + 276.14$ ;  $R=0.990$ ,  $S=0.185$ ,  $n=18$  (S1)  
where the  $l(\text{C}_2\text{--C}_6)$  parameter is the  $\text{C}_2\text{--C}_6$  bond length

$|E_{\pi}(\text{MTA})| = 299.25 \times l(\text{C}_6\text{=C}_7) - 401.95$ ;  $R=0.995$ ,  $S=0.129$ ,  $n=18$  (S2)  
where the  $l(\text{C}_6\text{=C}_7)$  parameter is the  $\text{C}_6\text{=C}_7$  bond length

$|E_{\pi}(\text{MTA})| = -217.33 \times l(\text{C}_7\text{--C}_8) + 322.07$ ;  $R=0.996$ ,  $S=0.110$ ,  $n=18$  (S3)  
where the  $l(\text{C}_7\text{--C}_8)$  parameter is the  $\text{C}_7\text{--C}_8$  bond length

$|E_{\pi}(\text{MTA})| = 528.01 \times l(\text{C}_8\text{=O}_9) - 401.95$ ;  $R=0.998$ ,  $S=0.077$ ,  $n=18$  (S4)  
where the  $l(\text{C}_8\text{=O}_9)$  parameter is the  $\text{C}_8\text{=O}_9$  bond length

For enones **1, 19–35**:  $|E_{\pi}(\text{MTA})| = -287.00 \times l(\text{C}_2\text{--C}_6) + 414.77$ ;  $R=0.946$ ,  $S=0.453$ ,  $n=18$  (S5)  
where the  $l(\text{C}_2\text{--C}_6)$  parameter is the  $\text{C}_2\text{--C}_6$  bond length

$|E_{\pi}(\text{MTA})| = 319.29 \times l(\text{C}_6\text{=C}_7) - 428.04$ ;  $R=0.963$ ,  $S=0.376$ ,  $n=18$  (S6)  
where the  $l(\text{C}_6\text{=C}_7)$  parameter is the  $\text{C}_6\text{=C}_7$  bond length

$|E_{\pi}(\text{MTA})| = -97.66 \times l(\text{C}_7\text{--C}_8) + 147.29$ ;  $R=0.923$ ,  $S=0.538$ ,  $n=18$  (S7)  
where the  $l(\text{C}_7\text{--C}_8)$  parameter is the  $\text{C}_7\text{--C}_8$  bond length

For enones **1–18**:  $|E_{\pi}(\text{MTA})| = -0.15 \times \nu_{\text{C=O}} + 263.41$ ;  $R=0.992$ ,  $S=0.160$ ,  $n=18$  (S8)  
where the  $\nu_{\text{C=O}}$  parameter is the  $\text{C=O}$  vibrational frequency

$|E_{\pi}(\text{MTA})| = 0.37 \times \Delta\delta_{\text{C=C}} - 2.65$ ;  $R=0.953$ ,  $S=0.392$ ,  $n=18$  (S9)  
where the  $\Delta\delta_{\text{C=C}}$  parameter is the  $^{13}\text{C}$  chemical shift difference for the olefinic moiety

## 12. Details of calculations, atom coordinates and total energies for B3LYP/6-311++G(d,p) optimized geometries of studied compounds (1–35)

The calculations were performed with Gaussian 09 program package.<sup>1</sup> All structures were checked by vibrational analysis to verify the absence of imaginary frequencies, and be sure that a true minimum of energy was found. The calculated  $\nu(\text{C}=\text{O})$  frequencies were identified with the GaussView 5.0.9 package. The  $^{13}\text{C}$  shielding constants for the structures under study and TMS as standard were calculated by the GIAO method.<sup>2</sup> The  $^{13}\text{C}$  chemical shifts were obtained as the difference between the shielding constant of TMS (184.04) and that of the  $^{13}\text{C}$  carbon in interest. The vibrational frequencies and the chemical shifts were calculated with the B3LYP/6-311++G(d,p) protocol.

### References

- 1 Gaussian 09, Revision B.01, M. J. Frisch, G. W. Trucks, H. B. Schlegel, G. E. Scuseria, M. A. Robb, J. R. Cheeseman, G. Scalmani, V. Barone, G. A. Petersson, H. Nakatsuji, X. Li, M. Caricato, A. Marenich, J. Bloino, B. G. Janesko, R. Gomperts, B. Mennucci, H. P. Hratchian, J. V. Ortiz, A. F. Izmaylov, J. L. Sonnenberg, D. Williams-Young, F. Ding, F. Lipparini, F. Egidi, J. Goings, B. Peng, A. Petrone, T. Henderson, D. Ranasinghe, V. G. Zakrzewski, J. Gao, N. Rega, G. Zheng, W. Liang, M. Hada, M. Ehara, K. Toyota, R. Fukuda, J. Hasegawa, M. Ishida, T. Nakajima, Y. Honda, O. Kitao, H. Nakai, T. Vreven, K. Throssell, J. A. Montgomery, Jr., J. E. Peralta, F. Ogliaro, M. Bearpark, J. J. Heyd, E. Brothers, K. N. Kudin, V. N. Staroverov, T. Keith, R. Kobayashi, J. Normand, K. Raghavachari, A. Rendell, J. C. Burant, S. S. Iyengar, J. Tomasi, M. Cossi, J. M. Millam, M. Klene, C. Adamo, R. Cammi, J. W. Ochterski, R. L. Martin, K. Morokuma, O. Farkas, J. B. Foresman, and D. J. Fox, Gaussian, Inc., Wallingford CT, 2010.
- 2 K. Wolinski, J. F. Hilton, P. Pulay, *J. Am. Chem. Soc.* 1990, **112**, 8251–8260.

### atom coordinates and total energies

1

$$E_{\text{total}} = -401.017556 \text{ Hartree}$$

|   |          |          |          |
|---|----------|----------|----------|
| C | -2.73817 | -0.75382 | 0.00006  |
| C | -2.93038 | 0.61657  | 0.00046  |
| C | -1.65273 | 1.21509  | -0.00035 |
| C | -0.69618 | 0.19964  | -0.00003 |
| N | -1.39491 | -0.99612 | -0.00047 |
| C | 0.72741  | 0.31270  | 0.00014  |
| C | 1.64659  | -0.68301 | 0.00028  |
| C | 3.08324  | -0.39814 | 0.00034  |
| O | 3.58192  | 0.71274  | -0.00026 |
| H | -3.45197 | -1.56207 | 0.00013  |
| H | -3.88506 | 1.11790  | 0.00093  |
| H | -1.42869 | 2.27080  | -0.00047 |
| H | -0.97440 | -1.91071 | -0.00104 |
| H | 1.11070  | 1.32967  | 0.00002  |
| H | 1.36452  | -1.73258 | 0.00037  |
| H | 3.73521  | -1.29633 | 0.00010  |

**2** $E_{\text{total}} = -535.0243367$  Hartree

|   |          |          |          |
|---|----------|----------|----------|
| C | 1.61767  | 0.24864  | -0.08717 |
| C | 1.45652  | 1.63820  | 0.00303  |
| C | 0.07471  | 1.89279  | 0.04047  |
| C | -0.61068 | 0.68112  | -0.01472 |
| N | 0.37052  | -0.31360 | -0.08683 |
| C | -2.00374 | 0.43242  | 0.00875  |
| C | -2.65010 | -0.76666 | -0.03943 |
| C | -4.10302 | -0.85337 | -0.00467 |
| O | -4.87400 | 0.09132  | 0.06880  |
| N | 2.76518  | -0.50318 | -0.20308 |
| H | 2.24794  | 2.36734  | 0.03825  |
| H | -0.39789 | 2.86075  | 0.11018  |
| H | 0.17425  | -1.29764 | -0.14604 |
| H | -2.63097 | 1.31778  | 0.07336  |
| H | -2.11365 | -1.70969 | -0.10714 |
| H | -4.50569 | -1.88758 | -0.05392 |
| C | 4.02523  | 0.17763  | 0.06511  |
| C | 2.70629  | -1.91979 | 0.12849  |
| H | 4.84799  | -0.47064 | -0.23758 |
| H | 4.08595  | 1.09238  | -0.52590 |
| H | 4.14991  | 0.43681  | 1.12650  |
| H | 3.66790  | -2.37609 | -0.10567 |
| H | 2.48238  | -2.10245 | 1.19021  |
| H | 1.95662  | -2.43001 | -0.48242 |

**3** $E_{\text{total}} = -456.3934694$  Hartree

|   |          |          |          |
|---|----------|----------|----------|
| C | 2.36815  | -0.24733 | -0.00108 |
| C | 2.38477  | 1.14378  | 0.02092  |
| C | 1.04131  | 1.57067  | 0.01018  |
| C | 0.21530  | 0.44956  | -0.00983 |
| N | 1.06809  | -0.65899 | -0.01189 |
| C | -1.20125 | 0.37695  | -0.00621 |
| C | -1.98843 | -0.73247 | 0.01701  |
| C | -3.44355 | -0.63618 | 0.01248  |
| O | -4.08827 | 0.39998  | -0.01459 |
| N | 3.40744  | -1.16467 | -0.08177 |
| H | 3.26856  | 1.76121  | 0.05618  |
| H | 0.68877  | 2.59045  | 0.03803  |
| H | 0.77259  | -1.61029 | -0.16043 |
| H | -1.71372 | 1.33524  | -0.02655 |
| H | -1.57160 | -1.73576 | 0.04563  |
| H | -3.97286 | -1.61201 | 0.03671  |
| H | 4.32277  | -0.74476 | -0.00625 |
| H | 3.32507  | -1.96822 | 0.52818  |

**4 cis** $E_{\text{total}} = -511.7241046$  Hartree

|   |          |          |          |
|---|----------|----------|----------|
| C | -1.88788 | -0.09155 | -0.03954 |
| C | -1.84965 | 1.29809  | -0.01417 |
| C | -0.48808 | 1.66309  | -0.00208 |
| C | 0.29203  | 0.50925  | -0.01708 |
| N | -0.60742 | -0.56427 | -0.02900 |
| C | 1.70229  | 0.37484  | -0.00323 |
| C | 2.44182  | -0.76857 | 0.01394  |
| C | 3.89842  | -0.73624 | 0.02285  |
| O | 4.58981  | 0.27027  | 0.01480  |
| N | -2.96047 | -0.96996 | -0.12177 |
| H | -2.71304 | 1.94039  | -0.00815 |
| H | -0.09265 | 2.66708  | 0.02889  |
| H | -0.34405 | -1.52664 | -0.16494 |
| H | 2.25581  | 1.31026  | -0.00843 |
| H | 1.98175  | -1.75334 | 0.02694  |
| H | 4.38346  | -1.73534 | 0.04086  |
| N | -4.23036 | -0.38352 | 0.06077  |
| H | -2.81376 | -1.85197 | 0.35907  |
| H | -4.89647 | -0.83630 | -0.55245 |
| H | -4.54548 | -0.44553 | 1.02564  |

**4 trans** $E_{\text{total}} = -511.7254578$  Hartree

|   |          |          |          |
|---|----------|----------|----------|
| C | -2.02138 | 0.28650  | -0.09035 |
| C | -1.85432 | 1.66449  | 0.04353  |
| C | -0.46796 | 1.90463  | 0.08141  |
| C | 0.20339  | 0.68703  | -0.01429 |
| N | -0.78879 | -0.29412 | -0.11689 |
| C | 1.59549  | 0.42090  | 0.00917  |
| C | 2.22551  | -0.78390 | -0.05557 |
| C | 3.67943  | -0.88837 | -0.02032 |
| O | 4.45821  | 0.04727  | 0.06757  |
| N | -3.18506 | -0.44875 | -0.25483 |
| H | -2.64919 | 2.39071  | 0.10660  |
| H | 0.01608  | 2.86336  | 0.18927  |
| H | -0.61582 | -1.27432 | -0.26567 |
| H | 2.23323  | 1.29756  | 0.08750  |
| H | 1.67757  | -1.71933 | -0.13468 |
| H | 4.07105  | -1.92577 | -0.08071 |
| N | -3.28333 | -1.76176 | 0.25660  |
| H | -4.02353 | 0.08001  | -0.06155 |
| H | -2.95838 | -2.43236 | -0.42982 |
| H | -2.77725 | -1.87329 | 1.13292  |

**5** $E_{\text{total}} = -476.263707$  Hartree

|   |          |          |          |
|---|----------|----------|----------|
| C | 2.36487  | -0.26759 | -0.00019 |
| C | 2.40698  | 1.11823  | 0.00004  |
| C | 1.06167  | 1.55067  | -0.00035 |
| C | 0.22984  | 0.43425  | -0.00004 |
| N | 1.07365  | -0.67926 | -0.00023 |
| C | -1.18963 | 0.37314  | 0.00013  |
| C | -1.98453 | -0.72838 | 0.00021  |
| C | -3.44090 | -0.61747 | 0.00034  |
| O | -4.07236 | 0.42600  | 0.00032  |
| O | 3.32866  | -1.21347 | -0.00022 |
| H | 3.29566  | 1.72948  | 0.00020  |
| H | 0.71561  | 2.57288  | -0.00047 |
| H | 0.78893  | -1.64556 | -0.00027 |
| H | -1.69313 | 1.33643  | 0.00015  |
| H | -1.57678 | -1.73564 | 0.00017  |
| H | -3.98059 | -1.58749 | 0.00034  |
| H | 4.19462  | -0.79267 | -0.00009 |

**6 cis** $E_{\text{total}} = -515.5750447$  Hartree

|   |          |          |          |
|---|----------|----------|----------|
| C | -1.89009 | -0.11397 | 0.00029  |
| C | -1.86757 | 1.27555  | -0.00007 |
| C | -0.50337 | 1.64515  | 0.00031  |
| C | 0.27735  | 0.49274  | 0.00002  |
| N | -0.61408 | -0.58117 | 0.00041  |
| C | 1.69260  | 0.36942  | -0.00022 |
| C | 2.43768  | -0.76694 | -0.00021 |
| C | 3.89703  | -0.72248 | -0.00042 |
| O | 4.57627  | 0.29086  | -0.00069 |
| O | -2.88251 | -1.01657 | 0.00042  |
| H | -2.72128 | 1.93204  | -0.00029 |
| H | -0.11149 | 2.65078  | 0.00036  |
| H | -0.37395 | -1.55928 | 0.00053  |
| H | 2.23823  | 1.30947  | -0.00036 |
| H | 1.98446  | -1.75464 | -0.00003 |
| H | 4.39175  | -1.71634 | -0.00045 |
| C | -4.21197 | -0.48990 | 0.00017  |
| H | -4.87463 | -1.35236 | 0.00031  |
| H | -4.38738 | 0.11358  | 0.89540  |
| H | -4.38722 | 0.11317  | -0.89536 |

**6 trans** $E_{\text{total}} = -515.5695891$  Hartree

|   |          |          |          |
|---|----------|----------|----------|
| C | 2.03207  | 0.30534  | 0.00002  |
| C | 1.86405  | 1.68337  | -0.00007 |
| C | 0.47618  | 1.91590  | 0.00005  |
| C | -0.19011 | 0.69128  | -0.00003 |
| N | 0.80566  | -0.29250 | 0.00003  |
| C | -1.58162 | 0.42023  | -0.00009 |
| C | -2.20829 | -0.78758 | -0.00015 |
| C | -3.66307 | -0.89281 | -0.00021 |
| O | -4.44395 | 0.04479  | 0.00026  |
| O | 3.20056  | -0.35536 | 0.00005  |
| H | 2.66350  | 2.40541  | -0.00015 |
| H | -0.01408 | 2.87744  | 0.00006  |
| H | 0.62864  | -1.28269 | 0.00014  |
| H | -2.22261 | 1.29818  | -0.00008 |
| H | -1.65848 | -1.72536 | -0.00017 |
| H | -4.05233 | -1.93287 | 0.00017  |
| C | 3.17069  | -1.78143 | 0.00004  |
| H | 4.21023  | -2.10106 | 0.00002  |
| H | 2.67662  | -2.16641 | 0.89881  |
| H | 2.67657  | -2.16640 | -0.89871 |

**7** $E_{\text{total}} = -440.3486524$  Hartree

|   |          |          |          |
|---|----------|----------|----------|
| C | -2.36623 | -0.21022 | 0.00032  |
| C | -2.35445 | 1.17781  | 0.00042  |
| C | -1.00775 | 1.59655  | 0.00010  |
| C | -0.20096 | 0.45993  | 0.00003  |
| N | -1.06322 | -0.62792 | 0.00010  |
| C | 1.22152  | 0.37304  | -0.00016 |
| C | 1.99436  | -0.74224 | -0.00028 |
| C | 3.45450  | -0.66105 | -0.00049 |
| O | 4.10603  | 0.36894  | -0.00054 |
| C | -3.50859 | -1.17107 | 0.00047  |
| H | -3.23136 | 1.80651  | 0.00063  |
| H | -0.64032 | 2.61144  | 0.00003  |
| H | -0.77083 | -1.59179 | 0.00000  |
| H | 1.74349  | 1.32638  | -0.00024 |
| H | 1.56785  | -1.74185 | -0.00022 |
| H | 3.97416  | -1.64202 | -0.00052 |
| H | -4.45326 | -0.62656 | 0.00064  |
| H | -3.49504 | -1.81732 | -0.88378 |
| H | -3.49476 | -1.81738 | 0.88467  |

**8 cis** $E_{\text{total}} = -671.4527124$  Hartree

|   |          |          |          |
|---|----------|----------|----------|
| C | -0.13495 | -0.25045 | -0.00021 |
| C | -0.15955 | 1.13703  | -0.00032 |
| C | 1.17738  | 1.58725  | -0.00021 |
| C | 2.01295  | 0.47190  | -0.00009 |
| N | 1.17838  | -0.63731 | -0.00004 |
| C | 3.43712  | 0.42051  | 0.00001  |
| C | 4.23765  | -0.67516 | 0.00014  |
| C | 5.69523  | -0.55784 | 0.00024  |
| O | 6.32107  | 0.48799  | 0.00006  |
| C | -1.24569 | -1.26478 | -0.00029 |
| H | -1.05167 | 1.74207  | -0.00044 |
| H | 1.51864  | 2.61130  | -0.00025 |
| H | 1.49483  | -1.59358 | 0.00007  |
| H | 3.93515  | 1.38658  | -0.00001 |
| H | 3.83620  | -1.68507 | 0.00018  |
| H | 6.23914  | -1.52556 | 0.00017  |
| C | -2.63059 | -0.65191 | -0.00007 |
| H | -1.13841 | -1.91530 | -0.87718 |
| H | -1.13826 | -1.91561 | 0.87635  |
| C | -3.27956 | -0.35675 | -1.20265 |
| C | -4.54732 | 0.22233  | -1.20464 |
| C | -5.18466 | 0.51353  | 0.00031  |
| C | -4.54693 | 0.22238  | 1.20507  |
| C | -3.27918 | -0.35669 | 1.20270  |
| H | -2.78898 | -0.58070 | -2.14456 |
| H | -5.03768 | 0.44251  | -2.14631 |
| H | -6.17231 | 0.96054  | 0.00046  |
| H | -5.03699 | 0.44261  | 2.14689  |
| H | -2.78830 | -0.58058 | 2.14446  |

**8 trans** $E_{\text{total}} = -671.4544772$  Hartree

|   |          |          |          |
|---|----------|----------|----------|
| C | 0.28842  | 1.73225  | -0.24424 |
| C | -0.47680 | 2.79929  | 0.20843  |
| C | -1.79410 | 2.33139  | 0.39243  |
| C | -1.82406 | 0.97852  | 0.05469  |
| N | -0.53623 | 0.64663  | -0.33722 |
| C | -2.92356 | 0.07162  | 0.09478  |
| C | -2.93801 | -1.24408 | -0.23526 |
| C | -4.15846 | -2.04379 | -0.13559 |
| O | -5.24433 | -1.63520 | 0.23810  |
| C | 1.73534  | 1.67309  | -0.64550 |
| H | -0.11197 | 3.80075  | 0.37733  |
| H | -2.64519 | 2.89910  | 0.73665  |
| H | -0.22247 | -0.28000 | -0.58077 |
| H | -3.86371 | 0.49881  | 0.43389  |
| H | -2.04996 | -1.76204 | -0.58713 |
| H | -4.04288 | -3.10658 | -0.43433 |
| C | 2.43512  | 0.38399  | -0.25112 |
| H | 1.81858  | 1.80509  | -1.73097 |
| H | 2.24376  | 2.53018  | -0.19478 |
| C | 2.82987  | -0.54173 | -1.22100 |
| C | 3.46158  | -1.73288 | -0.85816 |
| C | 3.70713  | -2.01105 | 0.48346  |
| C | 3.31788  | -1.09324 | 1.46046  |
| C | 2.68604  | 0.09188  | 1.09558  |
| H | 2.65068  | -0.32687 | -2.27001 |
| H | 3.76389  | -2.43759 | -1.62477 |
| H | 4.19979  | -2.93367 | 0.76830  |
| H | 3.50837  | -1.30165 | 2.50735  |
| H | 2.38093  | 0.79799  | 1.86122  |

**9** $E_{\text{total}} = -500.2790363$  Hartree

|   |          |          |          |
|---|----------|----------|----------|
| C | 2.36575  | -0.26350 | -0.00015 |
| C | 2.42729  | 1.10898  | -0.00026 |
| C | 1.07903  | 1.54183  | -0.00009 |
| C | 0.24444  | 0.42757  | 0.00005  |
| N | 1.07987  | -0.68956 | 0.00005  |
| C | -1.17948 | 0.37193  | 0.00020  |
| C | -1.97555 | -0.72493 | 0.00035  |
| C | -3.43532 | -0.60750 | 0.00053  |
| O | -4.05693 | 0.43968  | -0.00028 |
| F | 3.34642  | -1.16239 | -0.00020 |
| H | 3.32353  | 1.70605  | -0.00043 |
| H | 0.73525  | 2.56468  | -0.00012 |
| H | 0.79371  | -1.65556 | 0.00019  |
| H | -1.67810 | 1.33774  | 0.00021  |
| H | -1.57259 | -1.73417 | 0.00034  |
| H | -3.98013 | -1.57409 | -0.00017 |



**10** $E_{\text{total}} = -799.2323461$  Hartree

|   |          |          |          |
|---|----------|----------|----------|
| C | -1.97551 | 0.10535  | 0.00407  |
| C | -1.85465 | 1.48743  | 0.00161  |
| C | -0.47817 | 1.78608  | 0.00576  |
| C | 0.22944  | 0.58259  | 0.00134  |
| N | -0.71186 | -0.42743 | -0.00307 |
| C | 1.64551  | 0.38127  | 0.00142  |
| C | 2.32156  | -0.79148 | 0.00109  |
| C | 3.78766  | -0.82818 | 0.00021  |
| O | 4.51449  | 0.14807  | 0.00076  |
| S | -3.41586 | -0.91675 | -0.08184 |
| H | -2.67889 | 2.18219  | -0.00222 |
| H | -0.02598 | 2.76609  | 0.01066  |
| H | -0.51951 | -1.41619 | -0.02797 |
| H | 2.24180  | 1.28993  | 0.00159  |
| H | 1.81546  | -1.75312 | 0.00159  |
| H | 4.22829  | -1.84630 | -0.00094 |
| H | -3.59538 | -1.08554 | 1.24917  |

**11** $E_{\text{total}} = -860.6359811$  Hartree

|    |          |          |          |
|----|----------|----------|----------|
| C  | 1.97490  | 0.09211  | 0.00006  |
| C  | 1.88399  | 1.46965  | -0.00011 |
| C  | 0.50485  | 1.77229  | 0.00024  |
| C  | -0.21408 | 0.57883  | -0.00006 |
| N  | 0.72347  | -0.44557 | -0.00002 |
| C  | -1.62816 | 0.38427  | -0.00008 |
| C  | -2.31221 | -0.78491 | 0.00017  |
| C  | -3.77748 | -0.81106 | 0.00012  |
| O  | -4.49760 | 0.17052  | -0.00022 |
| Cl | 3.36946  | -0.92073 | -0.00002 |
| H  | 2.71443  | 2.15580  | -0.00014 |
| H  | 0.06294  | 2.75680  | 0.00047  |
| H  | 0.52431  | -1.43298 | -0.00069 |
| H  | -2.21891 | 1.29660  | -0.00028 |
| H  | -1.81264 | -1.75005 | 0.00048  |
| H  | -4.22532 | -1.82607 | 0.00038  |

**12** $E_{\text{total}} = -569.7763316$  Hartree

|   |          |          |          |
|---|----------|----------|----------|
| C | -1.69801 | 0.28906  | 0.00087  |
| C | -1.51530 | 1.66056  | 0.10833  |
| C | -0.13049 | 1.89756  | 0.14983  |
| C | 0.52530  | 0.66734  | 0.05538  |
| N | -0.45492 | -0.30168 | -0.01237 |
| C | 1.93260  | 0.40807  | 0.02361  |
| C | 2.55571  | -0.78950 | -0.06737 |
| C | 4.02033  | -0.89026 | -0.09152 |
| O | 4.78710  | 0.05196  | -0.03247 |
| C | -2.96739 | -0.46276 | -0.06393 |
| H | -2.31418 | 2.38216  | 0.16364  |
| H | 0.36382  | 2.85234  | 0.24320  |
| H | -0.28893 | -1.26804 | -0.24573 |
| H | 2.56785  | 1.28801  | 0.07866  |
| H | 2.00812  | -1.72645 | -0.12465 |
| H | 4.41581  | -1.92357 | -0.16976 |
| O | -4.01072 | 0.05666  | -0.41626 |
| N | -2.87713 | -1.80832 | 0.25585  |
| H | -3.76717 | -2.28624 | 0.29398  |
| H | -2.20844 | -2.09762 | 0.95498  |

**13 cis** $E_{\text{total}} = -514.3757096$  Hartree

|   |          |          |          |
|---|----------|----------|----------|
| C | -2.00118 | -0.07228 | 0.00004  |
| C | -1.93493 | 1.32060  | 0.00005  |
| C | -0.58074 | 1.67502  | -0.00001 |
| C | 0.17995  | 0.49641  | -0.00001 |
| N | -0.70867 | -0.54881 | 0.00000  |
| C | 1.60718  | 0.36345  | -0.00002 |
| C | 2.33316  | -0.77677 | 0.00003  |
| C | 3.80348  | -0.74678 | 0.00000  |
| O | 4.47827  | 0.26395  | -0.00004 |
| C | -3.14672 | -0.96960 | 0.00007  |
| H | -2.79251 | 1.97401  | 0.00008  |
| H | -0.16680 | 2.67175  | -0.00002 |
| H | -0.45772 | -1.52536 | -0.00000 |
| H | 2.16046  | 1.29860  | -0.00008 |
| H | 1.87136  | -1.76053 | 0.00010  |
| H | 4.29177  | -1.74219 | 0.00012  |
| O | -4.30543 | -0.60929 | -0.00009 |
| H | -2.88975 | -2.05220 | -0.00013 |

**13 trans** $E_{\text{total}} = -514.3816503$  Hartree

|   |          |          |          |
|---|----------|----------|----------|
| C | 2.10269  | 0.21447  | -0.00005 |
| C | 1.94692  | 1.60144  | 0.00005  |
| C | 0.56972  | 1.86427  | 0.00012  |
| C | -0.10462 | 0.63435  | -0.00000 |
| N | 0.85245  | -0.34647 | 0.00012  |
| C | -1.52123 | 0.40522  | -0.00005 |
| C | -2.16352 | -0.78309 | 0.00015  |
| C | -3.63338 | -0.85684 | 0.00011  |
| O | -4.37713 | 0.10419  | -0.00027 |
| C | 3.29511  | -0.61230 | -0.00012 |
| H | 2.75053  | 2.32174  | 0.00003  |
| H | 0.08857  | 2.83014  | 0.00017  |
| H | 0.70608  | -1.34542 | 0.00025  |
| H | -2.13781 | 1.29986  | -0.00022 |
| H | -1.63199 | -1.73056 | 0.00038  |
| H | -4.05045 | -1.88386 | 0.00040  |
| O | 3.26534  | -1.83087 | -0.00009 |
| H | 4.25222  | -0.05823 | -0.00015 |

**14** $E_{\text{total}} = -1819.1908418$  Hartree

|    |          |          |          |
|----|----------|----------|----------|
| C  | 0.68335  | 0.58951  | -0.00003 |
| C  | 0.42284  | 1.95173  | 0.00010  |
| C  | -0.97672 | 2.10484  | 0.00008  |
| C  | -1.55359 | 0.83556  | 0.00000  |
| N  | -0.51631 | -0.07198 | -0.00016 |
| C  | -2.94327 | 0.48612  | 0.00001  |
| C  | -3.48611 | -0.75162 | -0.00015 |
| C  | -4.94288 | -0.94729 | -0.00011 |
| O  | -5.76632 | -0.05287 | 0.00009  |
| C  | 1.96353  | -0.16017 | -0.00008 |
| H  | 1.16391  | 2.73266  | 0.00016  |
| H  | -1.52471 | 3.03418  | 0.00012  |
| H  | -0.61675 | -1.07500 | 0.00007  |
| H  | -3.63242 | 1.32622  | 0.00016  |
| H  | -2.87888 | -1.65262 | -0.00034 |
| H  | -5.27213 | -2.00607 | -0.00030 |
| Cl | 3.36438  | 0.94911  | -0.00013 |
| Cl | 2.06782  | -1.24173 | 1.46768  |
| Cl | 2.06797  | -1.24177 | -1.46746 |

**15** $E_{\text{total}} = -738.1643074$  Hartree

|   |          |          |          |
|---|----------|----------|----------|
| C | 1.34683  | 0.37676  | -0.03772 |
| C | 1.14938  | 1.74506  | -0.01593 |
| C | -0.24449 | 1.95324  | 0.00802  |
| C | -0.87239 | 0.70791  | 0.00200  |
| N | 0.12718  | -0.24242 | -0.01983 |
| C | -2.27600 | 0.41579  | 0.00595  |
| C | -2.87129 | -0.79702 | -0.00709 |
| C | -4.33571 | -0.92894 | -0.00171 |
| O | -5.11872 | 0.00061  | 0.01514  |
| C | 2.60877  | -0.40766 | -0.00090 |
| H | 1.92606  | 2.49242  | -0.01875 |
| H | -0.75670 | 2.90265  | 0.02344  |
| H | -0.00999 | -1.23997 | -0.06678 |
| H | -2.92936 | 1.28394  | 0.02169  |
| H | -2.30424 | -1.72379 | -0.02225 |
| H | -4.71091 | -1.97224 | -0.01459 |
| F | 3.64243  | 0.29406  | -0.49563 |
| F | 2.95248  | -0.78712 | 1.25703  |
| F | 2.49553  | -1.55602 | -0.71928 |

**16** $E_{\text{total}} = -493.2826031$  Hartree

|   |          |          |          |
|---|----------|----------|----------|
| N | 4.21322  | -1.41469 | -0.00003 |
| C | 2.11821  | 0.07295  | 0.00001  |
| C | 2.00206  | 1.45942  | 0.00035  |
| C | 0.62976  | 1.75709  | 0.00004  |
| C | -0.08028 | 0.55366  | 0.00004  |
| N | 0.84981  | -0.45957 | 0.00003  |
| C | -1.50125 | 0.35983  | -0.00002 |
| C | -2.17809 | -0.80933 | -0.00008 |
| C | -3.64928 | -0.83872 | -0.00016 |
| O | -4.36304 | 0.14463  | -0.00014 |
| C | 3.27134  | -0.74248 | -0.00004 |
| H | 2.82820  | 2.15184  | 0.00057  |
| H | 0.18029  | 2.73783  | 0.00002  |
| H | 0.64672  | -1.44670 | -0.00003 |
| H | -2.09287 | 1.27121  | -0.00004 |
| H | -1.67661 | -1.77337 | -0.00007 |
| H | -4.09745 | -1.85256 | -0.00016 |

**17** $E_{\text{total}} = -605.5796957$  Hartree

|   |          |          |          |
|---|----------|----------|----------|
| C | -1.71243 | 0.22802  | 0.00005  |
| C | -1.58593 | 1.60770  | 0.00018  |
| C | -0.20656 | 1.86545  | -0.00012 |
| C | 0.47437  | 0.63942  | -0.00007 |
| N | -0.47741 | -0.34939 | -0.00009 |
| C | 1.89213  | 0.41342  | -0.00008 |
| C | 2.53619  | -0.77246 | 0.00027  |
| C | 4.00887  | -0.84006 | 0.00018  |
| O | 4.74396  | 0.12621  | -0.00021 |
| N | -2.87912 | -0.59170 | 0.00002  |
| H | -2.40157 | 2.31115  | 0.00036  |
| H | 0.26973  | 2.83352  | -0.00016 |
| H | -0.34050 | -1.34982 | -0.00039 |
| H | 2.50513  | 1.31050  | -0.00041 |
| H | 2.00827  | -1.72202 | 0.00066  |
| H | 4.43154  | -1.86427 | 0.00054  |
| O | -3.97102 | -0.03419 | 0.00015  |
| O | -2.70004 | -1.81457 | -0.00027 |

**18 cis** $E_{\text{total}} = -530.3491023$  Hartree

|   |          |          |          |
|---|----------|----------|----------|
| C | 2.01574  | -0.10904 | -0.00010 |
| C | 1.97329  | 1.29090  | -0.00011 |
| C | 0.62650  | 1.65007  | -0.00023 |
| C | -0.14921 | 0.47197  | -0.00003 |
| N | 0.72268  | -0.57687 | 0.00001  |
| C | -1.58001 | 0.36195  | 0.00006  |
| C | -2.31784 | -0.76899 | 0.00019  |
| C | -3.79068 | -0.71971 | 0.00025  |
| O | -4.44736 | 0.30169  | 0.00019  |
| N | 3.02872  | -1.05703 | -0.00009 |
| H | 2.83820  | 1.93389  | -0.00014 |
| H | 0.21798  | 2.64926  | -0.00034 |
| H | 0.49550  | -1.56043 | 0.00010  |
| H | -2.11962 | 1.30492  | -0.00001 |
| H | -1.86706 | -1.75756 | 0.00024  |
| H | -4.29319 | -1.70733 | 0.00035  |
| O | 4.17256  | -0.61274 | -0.00016 |

**18 trans** $E_{\text{total}} = -530.3526752$  Hartree

|   |          |          |          |
|---|----------|----------|----------|
| C | 2.01574  | -0.10904 | -0.00010 |
| C | 1.97329  | 1.29090  | -0.00011 |
| C | 0.62650  | 1.65007  | -0.00023 |
| C | -0.14921 | 0.47197  | -0.00003 |
| N | 0.72268  | -0.57687 | 0.00001  |
| C | -1.58001 | 0.36195  | 0.00006  |
| C | -2.31784 | -0.76899 | 0.00019  |
| C | -3.79068 | -0.71971 | 0.00025  |
| O | -4.44736 | 0.30169  | 0.00019  |
| N | 3.02872  | -1.05703 | -0.00009 |
| H | 2.83820  | 1.93389  | -0.00014 |
| H | 0.21798  | 2.64926  | -0.00034 |
| H | 0.49550  | -1.56043 | 0.00010  |
| H | -2.11962 | 1.30492  | -0.00001 |
| H | -1.86706 | -1.75756 | 0.00024  |
| H | -4.29319 | -1.70733 | 0.00035  |
| O | 4.17256  | -0.61274 | -0.00016 |

**19** $E_{\text{total}} = -535.0485424$  Hartree

|   |          |          |          |
|---|----------|----------|----------|
| C | -3.80576 | 1.05910  | 0.04478  |
| C | -4.26948 | -0.24139 | -0.00062 |
| C | -3.13634 | -1.08700 | -0.03540 |
| C | -1.99647 | -0.28835 | -0.01097 |
| N | -2.43797 | 1.02229  | 0.03752  |
| C | -0.61941 | -0.69185 | -0.02982 |
| C | 0.47612  | 0.09468  | -0.01128 |
| C | 1.82359  | -0.53073 | -0.01553 |
| O | 1.95979  | -1.75274 | 0.01590  |
| H | -4.33935 | 1.99534  | 0.08175  |
| H | -5.30561 | -0.54057 | -0.00750 |
| H | -3.13056 | -2.16551 | -0.07422 |
| H | -1.84117 | 1.83174  | 0.06875  |
| H | -0.44768 | -1.76376 | -0.06058 |
| H | 0.38656  | 1.17307  | 0.02911  |
| C | 4.24903  | -0.26234 | 0.08321  |
| H | 4.88960  | 0.06024  | -0.74401 |
| H | 4.71337  | 0.05154  | 1.02599  |
| H | 4.16282  | -1.34559 | 0.07182  |
| N | 2.91608  | 0.31177  | -0.05427 |
| C | 2.83996  | 1.76709  | -0.05670 |
| H | 3.79440  | 2.16151  | -0.40931 |
| H | 2.07124  | 2.12828  | -0.74029 |
| H | 2.65386  | 2.18200  | 0.94255  |

**20** $E_{\text{total}} = -456.4206149$  Hartree

|   |          |          |          |
|---|----------|----------|----------|
| C | 3.11011  | -0.91390 | -0.01091 |
| C | 3.43737  | 0.42820  | 0.01200  |
| C | 2.22342  | 1.15294  | 0.01939  |
| C | 1.17226  | 0.24048  | 0.00159  |
| N | 1.74625  | -1.01857 | -0.01617 |
| C | -0.23848 | 0.49926  | 0.00221  |
| C | -1.24999 | -0.39104 | -0.00298 |
| C | -2.65563 | 0.07871  | -0.00449 |
| O | -2.97645 | 1.25885  | -0.02530 |
| H | 3.73768  | -1.79058 | -0.02453 |
| H | 4.43710  | 0.83246  | 0.02187  |
| H | 2.10651  | 2.22568  | 0.03647  |
| H | 1.23664  | -1.88592 | -0.03890 |
| H | -0.52006 | 1.54870  | 0.00666  |
| H | -1.07307 | -1.46349 | -0.00931 |
| N | -3.60088 | -0.92086 | -0.00514 |
| H | -4.56611 | -0.64723 | 0.09202  |
| H | -3.35904 | -1.88240 | 0.16639  |

**21 cis** $E_{\text{total}} = -511.7569528$  Hartree

|   |          |          |          |
|---|----------|----------|----------|
| C | 3.58451  | -0.97843 | 0.00579  |
| C | 3.95741  | 0.35140  | -0.03306 |
| C | 2.76914  | 1.11736  | -0.03599 |
| C | 1.68757  | 0.24158  | -0.00021 |
| N | 2.21813  | -1.03616 | 0.02447  |
| C | 0.28658  | 0.54814  | 0.00765  |
| C | -0.75360 | -0.30893 | 0.02527  |
| C | -2.14024 | 0.20217  | 0.03950  |
| O | -2.44140 | 1.38946  | 0.06235  |
| H | 4.18167  | -1.87602 | 0.02258  |
| H | 4.97022  | 0.72103  | -0.05597 |
| H | 2.68923  | 2.19330  | -0.06226 |
| H | 1.67969  | -1.88542 | 0.06129  |
| H | 0.04196  | 1.60663  | -0.00084 |
| H | -0.61347 | -1.38673 | 0.03749  |
| N | -3.10845 | -0.78111 | 0.03978  |
| N | -4.47097 | -0.46588 | -0.11872 |
| H | -2.86613 | -1.71670 | -0.24920 |
| H | -4.83972 | -0.18953 | 0.78796  |
| H | -4.53141 | 0.36001  | -0.71222 |

**21 trans** $E_{\text{total}} = -511.753424$  Hartree

|   |          |          |          |
|---|----------|----------|----------|
| C | 3.33218  | 1.11996  | -0.00004 |
| C | 3.84049  | -0.16507 | 0.00009  |
| C | 2.73714  | -1.04971 | 0.00008  |
| C | 1.57101  | -0.28927 | -0.00001 |
| N | 1.96709  | 1.03625  | -0.00012 |
| C | 0.20613  | -0.73172 | 0.00000  |
| C | -0.90401 | 0.03372  | -0.00005 |
| C | -2.23252 | -0.60780 | -0.00004 |
| O | -2.41435 | -1.81990 | -0.00002 |
| H | 3.83373  | 2.07447  | -0.00011 |
| H | 4.88633  | -0.42844 | 0.00015  |
| H | 2.76835  | -2.12851 | 0.00015  |
| H | 1.33996  | 1.82354  | -0.00014 |
| H | 0.06433  | -1.80878 | 0.00006  |
| H | -0.87674 | 1.11583  | -0.00011 |
| N | -3.33214 | 0.23042  | -0.00012 |
| N | -3.25885 | 1.62888  | 0.00016  |
| H | -4.22942 | -0.24023 | 0.00004  |
| H | -3.70358 | 2.01105  | -0.82859 |
| H | -3.70341 | 2.01075  | 0.82914  |

**22 cis** $E_{\text{total}} = -476.2985694$  Hartree

|   |          |          |          |
|---|----------|----------|----------|
| C | -3.09795 | -0.91089 | 0.00005  |
| C | -3.43087 | 0.43136  | 0.00005  |
| C | -2.22096 | 1.15959  | 0.00001  |
| C | -1.16612 | 0.24912  | 0.00001  |
| N | -1.73583 | -1.01218 | 0.00005  |
| C | 0.24122  | 0.50937  | -0.00002 |
| C | 1.24755  | -0.39087 | -0.00001 |
| C | 2.64237  | 0.05627  | -0.00004 |
| O | 3.03892  | 1.20203  | -0.00006 |
| H | -3.72330 | -1.78931 | 0.00007  |
| H | -4.43217 | 0.83161  | 0.00006  |
| H | -2.10777 | 2.23290  | -0.00002 |
| H | -1.22280 | -1.87832 | 0.00006  |
| H | 0.51866  | 1.55970  | -0.00004 |
| H | 1.08479  | -1.46235 | 0.00001  |
| O | 3.50404  | -1.00225 | -0.00002 |
| H | 4.39829  | -0.63102 | -0.00004 |



**22 trans** $E_{\text{total}} = -476.2881517$  Hartree

|   |          |          |          |
|---|----------|----------|----------|
| C | 3.09866  | -0.90470 | -0.00038 |
| C | 3.42061  | 0.44000  | 0.00020  |
| C | 2.20512  | 1.15833  | 0.00028  |
| C | 1.15707  | 0.24000  | -0.00008 |
| N | 1.73712  | -1.01734 | -0.00019 |
| C | -0.25018 | 0.49686  | 0.00004  |
| C | -1.26532 | -0.39374 | 0.00052  |
| C | -2.66412 | 0.08065  | 0.00058  |
| O | -3.00563 | 1.23588  | -0.00077 |
| H | 3.73122  | -1.77798 | -0.00074 |
| H | 4.41862  | 0.84828  | 0.00046  |
| H | 2.08309  | 2.23065  | 0.00066  |
| H | 1.23407  | -1.88897 | -0.00103 |
| H | -0.52947 | 1.54689  | -0.00023 |
| H | -1.08387 | -1.46562 | 0.00096  |
| O | -3.62076 | -0.89885 | 0.00002  |
| H | -3.21349 | -1.77255 | 0.00033  |

**23 cis** $E_{\text{total}} = -515.5938234$  Hartree

|   |          |          |          |
|---|----------|----------|----------|
| C | 3.32569  | 1.10496  | -0.00014 |
| C | 3.81856  | -0.18689 | 0.00022  |
| C | 2.70584  | -1.05634 | 0.00024  |
| C | 1.54778  | -0.28127 | -0.00005 |
| N | 1.96087  | 1.04034  | -0.00023 |
| C | 0.18481  | -0.71729 | -0.00004 |
| C | -0.93291 | 0.04291  | -0.00002 |
| C | -2.25496 | -0.61538 | -0.00004 |
| O | -2.41203 | -1.81350 | -0.00022 |
| H | 3.84007  | 2.05266  | -0.00032 |
| H | 4.86097  | -0.46288 | 0.00043  |
| H | 2.72315  | -2.13542 | 0.00050  |
| H | 1.34844  | 1.83889  | -0.00078 |
| H | 0.04374  | -1.79415 | -0.00006 |
| H | -0.87529 | 1.12379  | 0.00006  |
| O | -3.37254 | 0.17151  | 0.00002  |
| C | -3.30241 | 1.59842  | 0.00025  |
| H | -4.33665 | 1.93891  | 0.00031  |
| H | -2.80416 | 1.97838  | 0.89686  |
| H | -2.80418 | 1.97867  | -0.89625 |

**23 trans** $E_{\text{total}} = -515.6082584$  Hartree

|   |          |          |          |
|---|----------|----------|----------|
| C | -3.56624 | -0.99540 | 0.00001  |
| C | -3.95653 | 0.33085  | -0.00010 |
| C | -2.77864 | 1.11099  | -0.00010 |
| C | -1.68581 | 0.24730  | 0.00005  |
| N | -2.20039 | -1.03700 | 0.00011  |
| C | -0.28920 | 0.56681  | 0.00007  |
| C | 0.75342  | -0.28966 | -0.00004 |
| C | 2.13188  | 0.21457  | 0.00001  |
| O | 2.47324  | 1.37868  | 0.00013  |
| H | -4.15259 | -1.90020 | 0.00006  |
| H | -4.97411 | 0.68769  | -0.00019 |
| H | -2.71203 | 2.18812  | -0.00021 |
| H | -1.64958 | -1.87943 | 0.00034  |
| H | -0.05585 | 1.62769  | 0.00017  |
| H | 0.63618  | -1.36726 | -0.00018 |
| O | 3.02086  | -0.81375 | -0.00006 |
| C | 4.40806  | -0.44076 | -0.00008 |
| H | 4.96158  | -1.37752 | -0.00197 |
| H | 4.64690  | 0.14773  | -0.88735 |
| H | 4.64774  | 0.14450  | 0.88912  |

**24** $E_{\text{total}} = -440.3523589$  Hartree

|   |          |          |          |
|---|----------|----------|----------|
| C | -3.10605 | -0.94353 | -0.00021 |
| C | -3.45868 | 0.39362  | -0.00048 |
| C | -2.25956 | 1.13983  | -0.00023 |
| C | -1.19051 | 0.24568  | -0.00012 |
| N | -1.74218 | -1.02401 | -0.00008 |
| C | 0.21265  | 0.52711  | -0.00001 |
| C | 1.24150  | -0.34977 | 0.00015  |
| C | 2.64352  | 0.11820  | 0.00028  |
| O | 2.94106  | 1.30247  | 0.00020  |
| H | -3.71829 | -1.83116 | -0.00020 |
| H | -4.46587 | 0.77894  | -0.00071 |
| H | -2.16211 | 2.21466  | -0.00026 |
| H | -1.21572 | -1.88178 | 0.00004  |
| H | 0.47521  | 1.58182  | -0.00003 |
| H | 1.07892  | -1.42438 | 0.00020  |
| C | 3.71146  | -0.96122 | 0.00040  |
| H | 4.69965  | -0.50375 | 0.00044  |
| H | 3.60447  | -1.60271 | 0.88147  |
| H | 3.60459  | -1.60281 | -0.88060 |

**25** $E_{\text{total}} = -671.4577817$  Hartree

|   |          |          |          |
|---|----------|----------|----------|
| C | -4.09522 | -1.79619 | -0.27992 |
| C | -4.93793 | -0.91776 | 0.37674  |
| C | -4.19786 | 0.25816  | 0.62894  |
| C | -2.91228 | 0.08059  | 0.12016  |
| N | -2.88148 | -1.18842 | -0.43212 |
| C | -1.80864 | 0.99092  | 0.13479  |
| C | -0.57431 | 0.81060  | -0.38720 |
| C | 0.45499  | 1.86075  | -0.28816 |
| O | 0.26991  | 2.92074  | 0.28944  |
| H | -4.26881 | -2.79649 | -0.64317 |
| H | -5.96581 | -1.10983 | 0.64032  |
| H | -4.54503 | 1.15152  | 1.12506  |
| H | -2.07544 | -1.61026 | -0.86302 |
| H | -1.99626 | 1.94094  | 0.62800  |
| H | -0.29511 | -0.10688 | -0.89626 |
| C | 1.80082  | 1.56628  | -0.96289 |
| H | 1.62423  | 1.41445  | -2.03339 |
| H | 2.41408  | 2.46266  | -0.84919 |
| C | 2.50458  | 0.35281  | -0.38806 |
| C | 2.77776  | -0.77125 | -1.17374 |
| C | 3.42596  | -1.88256 | -0.63416 |
| C | 3.81008  | -1.88498 | 0.70462  |
| C | 3.54421  | -0.76871 | 1.49825  |
| C | 2.89807  | 0.33910  | 0.95659  |
| H | 2.49016  | -0.77404 | -2.22067 |
| H | 3.63434  | -2.74226 | -1.26168 |
| H | 4.31541  | -2.74647 | 1.12635  |
| H | 3.84257  | -0.76054 | 2.54079  |
| H | 2.69538  | 1.20358  | 1.58046  |

**26** $E_{\text{total}} = -500.3148948$  Hartree

|   |          |          |          |
|---|----------|----------|----------|
| C | -3.08133 | -0.91197 | 0.00001  |
| C | -3.41982 | 0.43029  | 0.00015  |
| C | -2.21451 | 1.16179  | 0.00009  |
| C | -1.15514 | 0.25391  | 0.00003  |
| N | -1.72091 | -1.01014 | 0.00006  |
| C | 0.24645  | 0.52188  | -0.00001 |
| C | 1.26093  | -0.37491 | -0.00004 |
| C | 2.64031  | 0.08339  | -0.00007 |
| O | 3.08429  | 1.18826  | -0.00009 |
| H | -3.70468 | -1.79188 | -0.00002 |
| H | -4.42266 | 0.82634  | 0.00022  |
| H | -2.10486 | 2.23547  | 0.00012  |
| H | -1.20692 | -1.87591 | 0.00005  |
| H | 0.51429  | 1.57459  | -0.00001 |
| H | 1.10684  | -1.44670 | -0.00003 |
| F | 3.50319  | -0.99370 | -0.00012 |

**27 cis** $E_{\text{total}} = -799.2473549$  Hartree

|   |          |          |          |
|---|----------|----------|----------|
| C | -3.44551 | -1.05723 | 0.00001  |
| C | -3.88680 | 0.25390  | -0.00015 |
| C | -2.74116 | 1.07769  | -0.00013 |
| C | -1.61448 | 0.25611  | 0.00006  |
| N | -2.08019 | -1.04804 | 0.00015  |
| C | -0.23689 | 0.63571  | 0.00007  |
| C | 0.85118  | -0.16892 | 0.00001  |
| C | 2.19533  | 0.42568  | 0.00009  |
| O | 2.43410  | 1.61099  | 0.00014  |
| H | -3.99780 | -1.98334 | 0.00006  |
| H | -4.91737 | 0.57113  | -0.00030 |
| H | -2.71542 | 2.15659  | -0.00028 |
| H | -1.50058 | -1.87085 | 0.00064  |
| H | -0.05320 | 1.70635  | 0.00015  |
| H | 0.76981  | -1.24952 | -0.00011 |
| S | 3.61552  | -0.72125 | -0.00013 |
| H | 2.92463  | -1.87957 | -0.00002 |

**27 trans** $E_{\text{total}} = -799.2510211$  Hartree

|   |          |          |          |
|---|----------|----------|----------|
| C | -3.43468 | -1.06406 | 0.00012  |
| C | -3.88793 | 0.24313  | -0.00013 |
| C | -2.74973 | 1.07726  | -0.00013 |
| C | -1.61582 | 0.26558  | 0.00005  |
| N | -2.06969 | -1.04250 | 0.00004  |
| C | -0.24060 | 0.65430  | 0.00008  |
| C | 0.84904  | -0.14779 | 0.00002  |
| C | 2.19618  | 0.42958  | 0.00007  |
| O | 2.46729  | 1.60802  | 0.00009  |
| H | -3.97846 | -1.99518 | 0.00023  |
| H | -4.92136 | 0.55097  | -0.00026 |
| H | -2.73389 | 2.15636  | -0.00027 |
| H | -1.48192 | -1.85976 | 0.00034  |
| H | -0.06301 | 1.72589  | 0.00013  |
| H | 0.77643  | -1.23032 | -0.00009 |
| S | 3.49644  | -0.85591 | -0.00013 |
| H | 4.50982  | 0.03189  | 0.00055  |

**28** $E_{\text{total}} = -860.6611603$  Hartree

|    |          |          |          |
|----|----------|----------|----------|
| C  | -3.40798 | -1.07519 | -0.00012 |
| C  | -3.87479 | 0.22864  | 0.00008  |
| C  | -2.74645 | 1.07276  | -0.00010 |
| C  | -1.60371 | 0.27090  | 0.00001  |
| N  | -2.04517 | -1.04215 | 0.00005  |
| C  | -0.23606 | 0.67298  | 0.00004  |
| C  | 0.85945  | -0.12682 | 0.00010  |
| C  | 2.18653  | 0.46725  | 0.00012  |
| O  | 2.50121  | 1.61486  | -0.00005 |
| H  | -3.94384 | -2.01097 | -0.00017 |
| H  | -4.91125 | 0.52573  | 0.00016  |
| H  | -2.74092 | 2.15198  | -0.00015 |
| H  | -1.45032 | -1.85460 | 0.00013  |
| H  | -0.07198 | 1.74651  | 0.00001  |
| H  | 0.80500  | -1.20680 | 0.00013  |
| Cl | 3.50340  | -0.82581 | -0.00005 |

**29** $E_{\text{total}} = -569.7854537$  Hartree

|   |          |          |          |
|---|----------|----------|----------|
| C | -3.70767 | 1.07714  | 0.00009  |
| C | -4.19818 | -0.21859 | 0.00003  |
| C | -3.08504 | -1.08288 | -0.00003 |
| C | -1.92750 | -0.30152 | -0.00000 |
| N | -2.34605 | 1.01877  | 0.00004  |
| C | -0.56434 | -0.71847 | -0.00003 |
| C | 0.53746  | 0.07327  | -0.00002 |
| C | 1.87127  | -0.50262 | -0.00005 |
| O | 2.13610  | -1.69902 | -0.00011 |
| H | -4.22657 | 2.02244  | 0.00015  |
| H | -5.24002 | -0.49660 | 0.00003  |
| H | -3.09849 | -2.16203 | -0.00008 |
| H | -1.73266 | 1.81776  | 0.00006  |
| H | -0.40556 | -1.79367 | -0.00007 |
| H | 0.49035  | 1.15532  | 0.00001  |
| C | 3.03328  | 0.52630  | -0.00009 |
| O | 2.83588  | 1.73112  | -0.00020 |
| N | 4.24660  | -0.06690 | 0.00027  |
| H | 5.08139  | 0.49605  | 0.00038  |
| H | 4.29620  | -1.07495 | 0.00046  |

**30 cis** $E_{\text{total}} = -514.3721488$  Hartree

|   |          |          |          |
|---|----------|----------|----------|
| C | -3.26843 | 1.09344  | -0.00008 |
| C | -3.76338 | -0.20072 | 0.00014  |
| C | -2.65368 | -1.06857 | 0.00019  |
| C | -1.49307 | -0.29132 | 0.00001  |
| N | -1.90713 | 1.03075  | -0.00017 |
| C | -0.13326 | -0.71654 | -0.00002 |
| C | 0.97779  | 0.06274  | -0.00022 |
| C | 2.30766  | -0.52612 | -0.00024 |
| O | 2.57316  | -1.72126 | 0.00035  |
| H | -3.78436 | 2.04037  | -0.00019 |
| H | -4.80614 | -0.47505 | 0.00025  |
| H | -2.67071 | -2.14765 | 0.00035  |
| H | -1.29246 | 1.82858  | -0.00032 |
| H | 0.01681  | -1.79300 | 0.00013  |
| H | 0.93666  | 1.14624  | -0.00038 |
| C | 3.49338  | 0.44994  | 0.00006  |
| O | 3.38607  | 1.65049  | -0.00013 |
| H | 4.47417  | -0.06571 | 0.00058  |

**30 trans** $E_{\text{total}} = -514.3636872$  Hartree

|   |          |          |          |
|---|----------|----------|----------|
| C | 3.45563  | -1.01827 | -0.00001 |
| C | 3.86173  | 0.30645  | 0.00001  |
| C | 2.69608  | 1.09677  | 0.00002  |
| C | 1.58993  | 0.24305  | -0.00000 |
| N | 2.09303  | -1.04829 | -0.00001 |
| C | 0.20706  | 0.58153  | -0.00001 |
| C | -0.86375 | -0.25398 | -0.00002 |
| C | -2.22756 | 0.27358  | -0.00001 |
| O | -2.52670 | 1.45381  | -0.00002 |
| H | 4.03478  | -1.92795 | -0.00002 |
| H | 4.88345  | 0.65091  | 0.00001  |
| H | 2.63981  | 2.17450  | 0.00003  |
| H | 1.53596  | -1.88682 | 0.00002  |
| H | -0.00974 | 1.64678  | 0.00000  |
| H | -0.74672 | -1.33383 | -0.00002 |
| C | -3.33864 | -0.80215 | 0.00000  |
| O | -4.50933 | -0.54008 | 0.00003  |
| H | -2.98335 | -1.85729 | -0.00002 |

**31** $E_{\text{total}} = -1819.1944568$  Hartree

|    |          |          |          |
|----|----------|----------|----------|
| C  | -4.63602 | -1.09974 | -0.00003 |
| C  | -5.19821 | 0.16581  | -0.00009 |
| C  | -4.13527 | 1.09144  | -0.00002 |
| C  | -2.93599 | 0.37707  | 0.00007  |
| N  | -3.27906 | -0.96509 | 0.00005  |
| C  | -1.60124 | 0.87874  | 0.00013  |
| C  | -0.44991 | 0.16337  | 0.00012  |
| C  | 0.83684  | 0.85337  | 0.00019  |
| O  | 0.99080  | 2.05255  | 0.00013  |
| H  | -5.10070 | -2.07285 | -0.00004 |
| H  | -6.25392 | 0.38513  | -0.00017 |
| H  | -4.20959 | 2.16814  | -0.00006 |
| H  | -2.62511 | -1.73078 | 0.00023  |
| H  | -1.51249 | 1.96133  | 0.00019  |
| H  | -0.44698 | -0.91904 | 0.00005  |
| C  | 2.10985  | -0.08125 | -0.00002 |
| Cl | 2.05699  | -1.12878 | -1.47462 |
| Cl | 3.60491  | 0.87181  | -0.00059 |
| Cl | 2.05783  | -1.12829 | 1.47499  |

**32** $E_{\text{total}} = -738.1648381$  Hartree

|   |          |          |          |
|---|----------|----------|----------|
| C | -3.98674 | -1.12924 | -0.00002 |
| C | -4.51763 | 0.15057  | -0.00002 |
| C | -3.43281 | 1.04862  | 0.00000  |
| C | -2.25078 | 0.30412  | 0.00001  |
| N | -2.62777 | -1.02944 | -0.00001 |
| C | -0.90632 | 0.77223  | 0.00003  |
| C | 0.23224  | 0.03310  | 0.00005  |
| C | 1.53415  | 0.68538  | 0.00007  |
| O | 1.74785  | 1.87953  | -0.00004 |
| H | -4.47627 | -2.09011 | -0.00003 |
| H | -5.56759 | 0.39577  | -0.00003 |
| H | -3.47992 | 2.12683  | 0.00001  |
| H | -1.99370 | -1.81179 | -0.00000 |
| H | -0.79160 | 1.85267  | 0.00004  |
| H | 0.21804  | -1.05090 | 0.00005  |
| C | 2.74746  | -0.29268 | -0.00000 |
| F | 2.70870  | -1.09968 | 1.08960  |
| F | 2.70840  | -1.09991 | -1.08943 |
| F | 3.91458  | 0.34567  | -0.00023 |

**33** $E_{\text{total}} = -493.278863$  Hartree

|   |          |          |          |
|---|----------|----------|----------|
| C | -3.27041 | -1.09102 | -0.00026 |
| C | -3.73195 | 0.21619  | -0.00001 |
| C | -2.60118 | 1.05394  | -0.00011 |
| C | -1.46008 | 0.24625  | 0.00002  |
| N | -1.90884 | -1.06540 | 0.00038  |
| C | -0.09465 | 0.64267  | 0.00004  |
| C | 1.00576  | -0.15490 | 0.00031  |
| C | 2.34046  | 0.42698  | 0.00035  |
| O | 2.61463  | 1.61440  | -0.00038 |
| H | -3.81169 | -2.02378 | -0.00039 |
| H | -4.76720 | 0.51736  | -0.00003 |
| H | -2.58984 | 2.13311  | -0.00020 |
| H | -1.31851 | -1.88127 | 0.00071  |
| H | 0.07741  | 1.71538  | -0.00012 |
| H | 0.94419  | -1.23787 | 0.00052  |
| C | 3.44188  | -0.56571 | -0.00002 |
| N | 4.30450  | -1.33238 | -0.00030 |

**34** $E_{\text{total}} = -605.5871603$  Hartree

|   |          |          |          |
|---|----------|----------|----------|
| C | 3.64936  | -1.09673 | 0.00029  |
| C | 4.15892  | 0.19356  | 0.00036  |
| C | 3.06033  | 1.07131  | 0.00026  |
| C | 1.89030  | 0.30463  | 0.00012  |
| N | 2.29088  | -1.02261 | 0.00026  |
| C | 0.54071  | 0.74677  | -0.00006 |
| C | -0.57879 | -0.02788 | -0.00016 |
| C | -1.87242 | 0.60079  | -0.00030 |
| O | -2.20667 | 1.74298  | -0.00030 |
| H | 4.15686  | -2.04833 | 0.00033  |
| H | 5.20453  | 0.45639  | 0.00046  |
| H | 3.08839  | 2.15021  | 0.00025  |
| H | 1.67055  | -1.81647 | 0.00027  |
| H | 0.40812  | 1.82512  | -0.00011 |
| H | -0.55732 | -1.10766 | -0.00010 |
| N | -3.08253 | -0.48450 | -0.00012 |
| O | -4.20261 | -0.02925 | -0.00043 |
| O | -2.78071 | -1.67175 | 0.00009  |



**35 cis** $E_{\text{total}} = -530.3425025$  Hartree

|   |          |          |          |
|---|----------|----------|----------|
| C | 3.26175  | -1.07034 | 0.02341  |
| C | 3.73966  | 0.22975  | -0.02018 |
| C | 2.61912  | 1.08225  | -0.03748 |
| C | 1.46868  | 0.29005  | -0.00334 |
| N | 1.90015  | -1.02618 | 0.03411  |
| C | 0.10540  | 0.70071  | -0.00500 |
| C | -0.99913 | -0.08723 | 0.04760  |
| C | -2.32076 | 0.50960  | 0.05092  |
| O | -2.63148 | 1.67117  | -0.06159 |
| H | 3.79049  | -2.00991 | 0.04667  |
| H | 4.77862  | 0.51748  | -0.03729 |
| H | 2.62195  | 2.16098  | -0.07008 |
| H | 1.29779  | -1.83295 | 0.05656  |
| H | -0.05279 | 1.77500  | -0.05278 |
| H | -0.94911 | -1.16788 | 0.09499  |
| N | -3.50948 | -0.45338 | 0.23147  |
| O | -3.30225 | -1.54799 | -0.21749 |

**35 trans** $E_{\text{total}} = -530.3431031$  Hartree

|   |          |          |          |
|---|----------|----------|----------|
| C | -3.43154 | -1.01843 | 0.00006  |
| C | -3.84797 | 0.30428  | -0.00024 |
| C | -2.68922 | 1.10242  | 0.00009  |
| C | -1.57643 | 0.25553  | 0.00003  |
| N | -2.07020 | -1.03951 | 0.00010  |
| C | -0.19700 | 0.60026  | 0.00001  |
| C | 0.87181  | -0.24044 | -0.00001 |
| C | 2.22543  | 0.27067  | 0.00001  |
| O | 2.62131  | 1.40710  | 0.00007  |
| H | -4.00470 | -1.93194 | 0.00008  |
| H | -4.87228 | 0.64085  | -0.00047 |
| H | -2.64073 | 2.18054  | 0.00009  |
| H | -1.50642 | -1.87402 | 0.00034  |
| H | 0.01331  | 1.66667  | 0.00006  |
| H | 0.77404  | -1.32049 | -0.00006 |
| N | 3.23740  | -0.93105 | -0.00006 |
| O | 4.37068  | -0.55877 | -0.00007 |
